# Supplementary material for: A concept of dual-salt polyvalent-metal storage battery
Source: Royal Society of Chemistry journal article supplement (doi:10.1039/c3ta13668j), 2013-11-01
Supplement: c3ta13668j.pdf [file c3ta13668j.pdf]

## Supplementary information: A concept of dual-salt polyvalent-metal storage battery

Shunsuke Yagi,<sup>1</sup> Tetsu Ichitsubo,<sup>2,\*</sup> Yoshimasa Shirai,<sup>2</sup> Shingo Yanai,<sup>2</sup> Takayuki Doi,<sup>3</sup>

Kuniaki Murase,<sup>2</sup> Eiichiro Matsubara<sup>2</sup>

<sup>1</sup>*Nanoscience and Nanotechnology Research Center,  
Osaka Prefecture University, Osaka 599-8570, Japan*

<sup>2</sup>*Department of Materials Science and Engineering,  
Kyoto University, Kyoto 606-8501, Japan*

<sup>3</sup>*Department of Molecular Chemistry and Biochemistry,  
Doshisha University, Kyotanabe, Kyoto 610-0321, Japan*

*\* Corresponding author*

It would be interesting to know to what extent the energy density is retained or improved by substituting a non-noble polyvalent metal for graphite negative electrode of conventional lithium ion batteries (LIBs). In general, the accurate energy density calculation is difficult, because there are many factors to be considered for the calculation (e.g., the weights of metallic current collectors, separator, solvent etc, other than the two electrodes and electrolyte solute). For the dual-salt Daniel type batteries, we have considered the case where magnesium is used as a negative electrode, on the assumption that small amount of electrolyte (or solvent) is only required by using a saturated electrolyte with precipitated salts. Here we consider two kinds of the anion A,  $\text{Cl}^-$  and  $\text{BF}_4^-$ , for  $\text{LiA}$  and  $\text{MgA}_2$  salts. SI Table I compares the expected capacities,  $Emf$ , energy densities of the conventional rocking-chair batteries and dual-salt Daniel type batteries. In this calculation, we have taken up the three intercalation-type positive electrode materials ( $\text{LiCoO}_2$ ,  $\text{LiFePO}_4$ , and  $\text{LiMn}_2\text{O}_4$ ), two conversion-type positive electrode materials ( $\text{FeF}_3$  and  $\text{CoF}_3$ ), and also  $\text{Mg}_2\text{Mo}_6\text{S}_8$  positive electrode materials<sup>4</sup> for a rocking-chair type Mg battery. The energy densities of the dual-salt Daniel type batteries are found to be almost comparable to the LIBs with a graphite negative electrode when using intercalation-type positive electrode materials on the assumption that  $\text{LiCl}$  salt, existing as a precipitates in the small amount of saturated electrolyte, works as a  $\text{Li}^+$  ion reservoir. The overall energy density ( $E_{\text{P+N}}$ ) can be kept at a high value since the energy density of Mg ( $E_{\text{N}}$ ) is significantly high; however, if we take a count of the electrolyte amount, the energy density is inevitably lowered.

SI Table I: Theoretical, actual capacities and expected energy densities for various combinations of positive and negative electrodes (PE and NE). The value of availability means the amount of Li (or Mg) that can be used without the decomposition of the active materials, and  $C_{\text{the}}$  and  $C_{\text{act}}$  mean the theoretical and actual ( $C_{\text{act}} = xC_{\text{the}}$ ) capacities.  $E_{\text{P}}$  and  $E_{\text{N}}$  (given by  $C_{\text{act}} \times \text{Emf}$ ) indicate the expected energy densities by using only positive electrode material, only negative electrode material, respectively, and  $E_{\text{P+N}}$  is the overall energy density of both electrode materials, where the underlined materials are defined as a positive active material for the calculation of  $E_{\text{P}}$ . Note that the amount of electrolyte (or solvent) is not considered for the energy-density calculations. The  $\text{Emf}$  values are estimated on the basis of the data in literature.<sup>20</sup> The theoretical capacities of graphite (372 mAh g<sup>-1</sup>) and Mg (2234 mAh g<sup>-1</sup>) were used for the estimation of the energy densities.

| Capacity and energy density                                                                                                                                  | $x$ | $C_{\text{the}}$<br>mAh/g | $C_{\text{act}}$<br>mAh/g | $\text{Emf}$<br>V | $E_{\text{P}}$<br>mWh/g | $E_{\text{N}}$<br>mWh/g | $E_{\text{P+N}}$<br>mWh/g |
|--------------------------------------------------------------------------------------------------------------------------------------------------------------|-----|---------------------------|---------------------------|-------------------|-------------------------|-------------------------|---------------------------|
| <b>Rocking-chair type</b>                                                                                                                                    |     |                           |                           |                   |                         |                         |                           |
| <i>Intercalation reaction</i>                                                                                                                                |     |                           |                           |                   |                         |                         |                           |
| $\text{Li}_{1-x}\text{CoO}_2 + x\text{LiC}_6 = \underline{\text{LiCoO}_2} + 6xC$                                                                             | 0.6 | 274                       | 164                       | 3.7               | 608                     | 1378                    | 422                       |
| $\text{Li}_{1-x}\text{FePO}_4 + x\text{LiC}_6 = \underline{\text{LiFePO}_4} + 6xC$                                                                           | 1.0 | 170                       | 170                       | 3.1               | 527                     | 1154                    | 362                       |
| $\text{Li}_{1-x}\text{Mn}_2\text{O}_4 + x\text{LiC}_6 = \underline{\text{LiMn}_2\text{O}_4} + 6xC$                                                           | 0.8 | 148                       | 119                       | 3.5               | 415                     | 1303                    | 315                       |
| $(1/2)\text{Mg}_{2(1-x)}\text{Mo}_6\text{S}_8 + x\text{Mg} = (1/2)\underline{\text{Mg}_2\text{Mo}_6\text{S}_8} + 0$                                          | 1.0 | 122                       | 122                       | 1.2               | 146                     | 2681                    | 146                       |
| <i>Conversion reaction</i>                                                                                                                                   |     |                           |                           |                   |                         |                         |                           |
| $\text{FeF}_3 + 3\text{LiC}_6 = \underline{\text{Fe}} + 3\underline{\text{LiF}} + 18\text{C}$                                                                | -   | 602                       | 602                       | 2.6               | 1565                    | 968                     | 598                       |
| $\text{CoF}_3 + 3\text{LiC}_6 = \underline{\text{Co}} + 3\underline{\text{LiF}} + 18\text{C}$                                                                | -   | 588                       | 588                       | 3.3               | 1941                    | 1229                    | 752                       |
| <b>Dual-salt Daniel type</b>                                                                                                                                 |     |                           |                           |                   |                         |                         |                           |
| <i>Intercalation reaction with LiCl</i>                                                                                                                      |     |                           |                           |                   |                         |                         |                           |
| $\underline{\text{Li}_{1-x}\text{CoO}_2} + x\underline{\text{LiCl}} + (1/2)x\text{Mg} = \text{LiCoO}_2 + (1/2)x\text{MgCl}_2$                                | 0.6 | 225                       | 135                       | 3.3               | 445                     | 7372                    | 420                       |
| $\underline{\text{Li}_{1-x}\text{FePO}_4} + x\underline{\text{LiCl}} + (1/2)x\text{Mg} = \text{LiFePO}_4 + (1/2)x\text{MgCl}_2$                              | 1.0 | 139                       | 139                       | 2.7               | 375                     | 6031                    | 353                       |
| $\underline{\text{Li}_{1-x}\text{Mn}_2\text{O}_4} + x\underline{\text{LiCl}} + (1/2)x\text{Mg} = \text{LiMn}_2\text{O}_4 + (1/2)x\text{MgCl}_2$              | 0.8 | 128                       | 103                       | 3.1               | 318                     | 6925                    | 304                       |
| <i>Intercalation reaction with LiBF<sub>4</sub></i>                                                                                                          |     |                           |                           |                   |                         |                         |                           |
| $\underline{\text{Li}_{1-x}\text{CoO}_2} + x\underline{\text{LiBF}_4} + (1/2)x\text{Mg} = \text{LiCoO}_2 + (1/2)x\text{Mg}(\text{BF}_4)_2$                   | 0.6 | 179                       | 107                       | 3.3               | 354                     | 7372                    | 338                       |
| $\underline{\text{Li}_{1-x}\text{FePO}_4} + x\underline{\text{LiBF}_4} + (1/2)x\text{Mg} = \text{LiFePO}_4 + (1/2)x\text{Mg}(\text{BF}_4)_2$                 | 1.0 | 110                       | 110                       | 2.7               | 296                     | 6031                    | 282                       |
| $\underline{\text{Li}_{1-x}\text{Mn}_2\text{O}_4} + x\underline{\text{LiBF}_4} + (1/2)x\text{Mg} = \text{LiMn}_2\text{O}_4 + (1/2)x\text{Mg}(\text{BF}_4)_2$ | 0.8 | 107                       | 86                        | 3.1               | 266                     | 6925                    | 256                       |
| <i>Conversion reaction with LiCl</i>                                                                                                                         |     |                           |                           |                   |                         |                         |                           |
| $\underline{\text{FeF}_3} + 3\underline{\text{LiCl}} + (3/2)\text{Mg} = 3\underline{\text{LiF}} + \underline{\text{Fe}} + (3/2)\text{MgCl}_2$                | -   | 335                       | 335                       | 2.2               | 737                     | 4914                    | 641                       |
| $\underline{\text{CoF}_3} + 3\underline{\text{LiCl}} + (3/2)\text{Mg} = 3\underline{\text{LiF}} + \underline{\text{Co}} + (3/2)\text{MgCl}_2$                | -   | 331                       | 331                       | 2.9               | 959                     | 6478                    | 835                       |
| <i>Conversion reaction with LiBF<sub>4</sub></i>                                                                                                             |     |                           |                           |                   |                         |                         |                           |
| $\underline{\text{FeF}_3} + 3\underline{\text{LiBF}_4} + (3/2)\text{Mg} = 3\underline{\text{LiF}} + \underline{\text{Fe}} + (3/2)\text{Mg}(\text{BF}_4)_2$   | -   | 204                       | 204                       | 2.2               | 449                     | 4914                    | 411                       |
| $\underline{\text{CoF}_3} + 3\underline{\text{LiBF}_4} + (3/2)\text{Mg} = 3\underline{\text{LiF}} + \underline{\text{Co}} + (3/2)\text{Mg}(\text{BF}_4)_2$   | -   | 202                       | 202                       | 2.9               | 587                     | 6478                    | 538                       |
